# Supplementary material for: Identification of DGUOK-AS1 as a Prognostic Factor in Breast Cancer by Bioinformatics Analysis
Source: Front Oncol. 2020 Jul 17;10:1092. doi: 10.3389/fonc.2020.01092 (PMC7379746; doi:10.3389/fonc.2020.01092)
Supplement: Supplementary file 2 [file Table_4.xlsx]

## Sheet: Sheet1
geneSymbol	moduleColor	GS.Surtime	p.GS.Surtime	MM.darkorange2	p.MM.darkorange2	MM.midnightblue	p.MM.midnightblue	MM.darkgreen	p.MM.darkgreen	MM.lightcyan1	p.MM.lightcyan1	MM.darkorange	p.MM.darkorange	MM.cyan	p.MM.cyan	MM.ivory	p.MM.ivory	MM.lightsteelblue1	p.MM.lightsteelblue1	MM.orangered4	p.MM.orangered4	MM.darkmagenta	p.MM.darkmagenta	MM.grey	p.MM.grey
ENST00000519762	lightcyan1	0.559716	0.000173268	-0.375607	0.0169216	-0.397918	0.0109959	-0.511172	0.000749613	0.51808	0.00061665	0.0815091	0.617078	0.489822	0.00133626	-0.25686	0.109602	0.258653	0.107059	0.176571	0.275752	0.272491	0.0889252	-0.305536	0.0552082
ENST00000439192	cyan	0.611134	2.80596e-05	-0.463855	0.002572	-0.212594	0.187826	-0.415477	0.00767361	0.107689	0.508345	-0.467086	0.00237729	0.763215	1.02703e-08	-0.182884	0.258669	0.0279276	0.864175	0.198363	0.219817	-0.283621	0.0761436	0.0921373	0.571765
ENST00000413452	cyan	0.633639	1.13931e-05	-0.509271	0.000790413	-0.229903	0.153544	-0.466257	0.00242596	0.142451	0.380567	-0.457067	0.00302728	0.786568	1.78366e-09	-0.16949	0.295771	0.080532	0.621319	0.186422	0.249412	-0.255551	0.111486	0.0798573	0.624254
ENST00000590653	cyan	-0.651673	5.24565e-06	0.521555	0.000558092	0.411695	0.00830501	0.739434	5.03372e-08	-0.359101	0.022868	0.481789	0.00164527	-0.464096	0.00255703	-0.134271	0.408789	-0.378401	0.0160571	0.370613	0.0185646	0.106654	0.512454	-0.234166	0.145851
ENST00000518014	darkorange	-0.826125	5.25813e-11	0.69494	6.50941e-07	0.688274	9.18698e-07	0.488471	0.00138432	-0.378066	0.0161589	0.711509	2.65273e-07	-0.292324	0.0671896	0.32106	0.0433835	-0.0824806	0.612874	0.301159	0.058972	0.0866801	0.594842	0.0366655	0.822279
ENST00000545709	lightcyan1	-0.77914	3.18425e-09	0.604408	3.62512e-05	0.880798	6.65473e-14	0.656327	4.25845e-06	-0.805461	3.66225e-10	0.335356	0.0343951	-0.143821	0.375953	0.36496	0.0205843	-0.368837	0.0191803	0.426503	0.00606307	-0.347275	0.028124	-0.00261904	0.987203
ENST00000452919	darkorange	-0.847762	5.14002e-12	0.711576	2.6428e-07	0.575276	0.000103119	0.342655	0.0304323	-0.341968	0.0307881	0.468814	0.00227852	-0.339457	0.0321194	0.323906	0.0414568	-0.0839987	0.606329	-0.0138338	0.932482	-0.122008	0.453262	0.170422	0.293083
ENST00000416700	darkorange	-0.837544	1.60753e-11	0.671835	2.07014e-06	0.632562	1.19147e-05	0.605992	3.41459e-05	-0.368726	0.0192195	0.693214	7.12274e-07	-0.413221	0.00804511	0.164643	0.309999	-0.177902	0.27209	0.307064	0.0539413	0.184935	0.253276	-0.0253148	0.87678
ENST00000443252	darkorange	-0.899653	2.99209e-15	0.628957	1.38234e-05	0.715958	2.06256e-07	0.565877	0.000141524	-0.492829	0.00123453	0.492079	0.00125926	-0.323105	0.0419913	0.22724	0.158496	-0.248209	0.122513	0.21053	0.192249	-0.0361039	0.824958	0.134647	0.407465
ENST00000420855	darkorange	-0.825586	5.54847e-11	0.70163	4.56333e-07	0.49921	0.00104112	0.533735	0.000390029	-0.259591	0.105748	0.636808	9.97722e-06	-0.494189	0.00119084	0.168247	0.29938	-0.145952	0.368845	0.160255	0.323249	0.154564	0.340951	-0.0943176	0.562661
ENST00000655915	darkorange	-0.854235	2.38906e-12	0.699279	5.17562e-07	0.557887	0.000183861	0.587349	6.76794e-05	-0.324548	0.0410317	0.630029	1.32282e-05	-0.478718	0.00177912	0.137894	0.396145	-0.181413	0.262585	0.207685	0.198465	0.146539	0.366902	-0.0411552	0.800932
ENST00000417887	darkorange	-0.846407	6.00734e-12	0.654946	4.53187e-06	0.644619	7.14755e-06	0.58718	6.8087e-05	-0.361499	0.0219089	0.660337	3.54794e-06	-0.343002	0.0302537	0.085768	0.598739	-0.213082	0.186789	0.326326	0.0398734	0.15318	0.345342	0.0201865	0.901604
ENST00000433106	darkorange	-0.824727	6.04318e-11	0.641403	8.20876e-06	0.6368	9.98053e-06	0.659672	3.65756e-06	-0.396277	0.0113612	0.684846	1.09301e-06	-0.464893	0.00250795	0.16533	0.307956	-0.196195	0.225003	0.303937	0.0565607	0.206378	0.201367	-0.0121166	0.940848
